# Supplementary material
Source: publisher figshare collection journal article supplement (https://geolsoc.figshare.com/ndownloader/files/5421707)
Supplement: Supplementary file 1 [file 5421707]

Table DS8. Cleaned shipboard pass-through cryogenic magnetometer data for Hole 647A
(Srivastava, Arthur et al. (1987). To avoid the end effect of measuring voids at the end of the core
sections, 10-15 cm of the 5mT AFD data was removed from the bottom and top of each section.
SRIVISTAVA, S.P., ARTHUR, M.A. et al. (eds) 1987. Proceedings of the Ocean Drilling
	Program, Initial Reports, 105, Ocean Drilling Program, College Station, TX.
Core	Type	Section	Interval (cm)	Depth (mbsf)	Treatment	Demag	Level (mT)	Declination (�)	Inclination (�)	Intensity	Run
43	R	1	15	404.95	NRM	AFD	5	82.43	24.74	2.393	882
43	R	1	25	405.05	NRM	AFD	5	199.93	36.1	0.343	882
43	R	1	35	405.15	NRM	AFD	5	322.92	-0.33	0.488	882
43	R	1	45	405.25	NRM	AFD	5	319.59	14.46	0.465	882
43	R	1	55	405.35	NRM	AFD	5	270.18	31.22	0.378	882
43	R	1	65	405.45	NRM	AFD	5	348.74	50.05	0.417	882
43	R	1	75	405.55	NRM	AFD	5	167.55	47.99	0.669	882
43	R	1	85	405.65	NRM	AFD	5	161.92	34.32	0.71	882
43	R	1	95	405.75	NRM	AFD	5	170.84	44.71	1.17	882
43	R	1	104	405.84	NRM	AFD	5	192.58	39.98	0.857	882
43	R	1	115	405.95	NRM	AFD	5	340.08	59.48	0.616	882
43	R	1	125	406.05	NRM	AFD	5	337.53	73.33	0.586	882
43	R	1	135	406.15	NRM	AFD	5	62.85	51.66	0.741	882
43	R	2	15	406.45	NRM	AFD	5	212.8	68.16	0.3	884
43	R	2	25	406.55	NRM	AFD	5	294.9	43.28	0.509	884
43	R	2	35	406.65	NRM	AFD	5	35.23	45.49	0.372	884
43	R	2	45	406.75	NRM	AFD	5	318.84	61.19	0.331	884
43	R	2	55	406.85	NRM	AFD	5	216.08	54.21	0.399	884
43	R	2	65	406.95	NRM	AFD	5	22.93	75.41	0.406	884
43	R	2	75	407.05	NRM	AFD	5	51.96	36.91	1.175	884
43	R	2	85	407.15	NRM	AFD	5	40.68	42.88	1.203	884
43	R	2	95	407.25	NRM	AFD	5	171.3	53.92	0.35	884
43	R	2	104	407.34	NRM	AFD	5	263.73	54.57	0.56	884
43	R	2	115	407.45	NRM	AFD	5	285.01	23.33	0.641	884
43	R	2	125	407.55	NRM	AFD	5	274.63	19.52	0.82	884
43	R	2	135	407.65	NRM	AFD	5	249.62	24.02	0.709	884
43	R	3	15	407.95	NRM	AFD	5	214.19	36.72	0.679	886
43	R	3	25	408.05	NRM	AFD	5	323.95	52.96	0.688	886
43	R	3	35	408.15	NRM	AFD	5	3.78	75.35	0.747	886
43	R	3	45	408.25	NRM	AFD	5	99.87	66.79	0.524	886
43	R	3	55	408.35	NRM	AFD	5	42.42	49.18	0.417	886
43	R	3	65	408.45	NRM	AFD	5	115.99	75.38	0.614	886
43	R	3	75	408.55	NRM	AFD	5	198.16	64.12	1.135	886
43	R	3	85	408.65	NRM	AFD	5	301.74	42.49	1.274	886
43	R	3	95	408.75	NRM	AFD	5	5.42	66	0.813	886
43	R	3	104	408.84	NRM	AFD	5	201.2	35.43	0.773	886
43	R	3	115	408.95	NRM	AFD	5	320.19	43.72	0.85	886
43	R	3	125	409.05	NRM	AFD	5	219.48	66.93	0.643	886
43	R	3	135	409.15	NRM	AFD	5	54.72	47.36	0.756	886
43	R	4	15	409.45	NRM	AFD	5	122.07	42.93	1.034	888
43	R	4	25	409.55	NRM	AFD	5	98.08	41.38	0.999	888
43	R	4	35	409.65	NRM	AFD	5	291.19	30.45	1.205	888
43	R	4	45	409.75	NRM	AFD	5	100.44	48.24	1.271	888
43	R	4	55	409.85	NRM	AFD	5	20.16	42.05	0.605	888
43	R	4	65	409.95	NRM	AFD	5	313.62	45.89	0.836	888
43	R	4	75	410.05	NRM	AFD	5	172.58	49.9	0.605	888
43	R	4	85	410.15	NRM	AFD	5	174.04	-50.65	0.127	888
43	R	4	95	410.25	NRM	AFD	5	49.86	41.93	0.671	888
43	R	4	104	410.34	NRM	AFD	5	103.07	38.74	0.774	888
43	R	4	115	410.45	NRM	AFD	5	82.27	34.13	0.539	888
43	R	4	125	410.55	NRM	AFD	5	28.53	39.42	0.63	888
43	R	4	135	410.65	NRM	AFD	5	276.97	73.75	0.419	888
43	R	5	15	410.95	NRM	AFD	5	233.21	64.95	0.1	890
43	R	5	25	411.05	NRM	AFD	5	60.67	74.66	0.143	890
43	R	5	35	411.15	NRM	AFD	5	218.51	63.88	0.224	890
43	R	5	45	411.25	NRM	AFD	5	162.59	42.45	0.195	890
43	R	5	55	411.35	NRM	AFD	5	122.8	50.49	0.078	890
43	R	5	65	411.45	NRM	AFD	5	122.22	58.46	0.213	890
43	R	5	75	411.55	NRM	AFD	5	266.2	63.91	0.208	890
43	R	5	85	411.65	NRM	AFD	5	72.02	48.9	0.149	890
43	R	5	95	411.75	NRM	AFD	5	9.45	58.64	0.31	890
43	R	5	104	411.84	NRM	AFD	5	86.12	26.71	1.19	890
43	R	5	115	411.95	NRM	AFD	5	111.24	54.02	0.647	890
43	R	5	125	412.05	NRM	AFD	5	34.21	38.76	0.867	890
43	R	5	135	412.15	NRM	AFD	5	356	41.94	0.986	890
43	R	6	15	412.45	NRM	AFD	5	266.36	50.48	0.577	892
43	R	6	25	412.55	NRM	AFD	5	147.44	44.66	0.638	892
43	R	6	35	412.65	NRM	AFD	5	260.99	67.7	0.373	892
43	R	6	45	412.75	NRM	AFD	5	20.28	74.61	0.418	892
43	R	6	55	412.85	NRM	AFD	5	167.76	66.21	0.61	892
43	R	6	65	412.95	NRM	AFD	5	194.45	59.59	0.459	892
43	R	6	75	413.05	NRM	AFD	5	261.84	59.9	0.479	892
43	R	6	85	413.15	NRM	AFD	5	160.71	45.34	0.485	892
44	R	1	15	414.65	NRM	AFD	5	301.15	41.58	0.489	895
44	R	1	25	414.75	NRM	AFD	5	354.06	60.38	0.335	895
44	R	1	35	414.85	NRM	AFD	5	81.82	45.38	0.318	895
44	R	1	45	414.95	NRM	AFD	5	305.5	55.12	0.488	895
44	R	1	55	415.05	NRM	AFD	5	300.86	52.85	0.853	895
44	R	1	65	415.15	NRM	AFD	5	34.67	72.72	0.509	895
44	R	1	75	415.25	NRM	AFD	5	22.96	54.87	0.377	895
44	R	1	85	415.35	NRM	AFD	5	298.37	59.62	0.278	895
44	R	1	95	415.45	NRM	AFD	5	193.48	59.2	0.188	895
44	R	1	104	415.54	NRM	AFD	5	150.9	52.72	0.205	895
44	R	1	115	415.65	NRM	AFD	5	303.46	50.76	0.096	895
44	R	1	125	415.75	NRM	AFD	5	175.53	44.54	0.263	895
44	R	1	135	415.85	NRM	AFD	5	316.93	46.69	0.353	895
44	R	2	15	416.15	NRM	AFD	5	313.33	41.85	0.497	897
44	R	2	25	416.25	NRM	AFD	5	41.86	40.58	0.963	897
44	R	2	35	416.35	NRM	AFD	5	270.98	43.09	0.865	897
44	R	2	45	416.45	NRM	AFD	5	246.8	34.45	0.816	897
44	R	2	55	416.55	NRM	AFD	5	302.12	28.15	0.46	897
44	R	2	65	416.65	NRM	AFD	5	340.64	67.8	0.237	897
44	R	2	75	416.75	NRM	AFD	5	41.48	46	0.35	897
44	R	2	85	416.85	NRM	AFD	5	178.2	48.23	0.218	897
44	R	2	95	416.95	NRM	AFD	5	188.86	42.8	0.226	897
44	R	2	104	417.04	NRM	AFD	5	18.12	32.36	0.2	897
44	R	2	115	417.15	NRM	AFD	5	63.67	37.82	0.354	897
44	R	2	125	417.25	NRM	AFD	5	87.71	29.55	0.439	897
44	R	2	135	417.35	NRM	AFD	5	248.53	34.86	0.33	897
44	R	3	15	417.65	NRM	AFD	5	304.55	47.95	0.576	899
44	R	3	25	417.75	NRM	AFD	5	31.36	65.65	0.592	899
44	R	3	35	417.85	NRM	AFD	5	147.35	49.8	1.144	899
44	R	3	45	417.95	NRM	AFD	5	194.1	39.02	0.97	899
44	R	3	55	418.05	NRM	AFD	5	73.69	41.2	0.389	899
44	R	3	65	418.15	NRM	AFD	5	90.7	45.73	0.352	899
44	R	3	75	418.25	NRM	AFD	5	81.13	57.84	0.496	899
44	R	3	85	418.35	NRM	AFD	5	217.05	78.49	0.706	899
44	R	3	95	418.45	NRM	AFD	5	94.96	30.42	0.881	899
44	R	3	104	418.54	NRM	AFD	5	94.19	43.04	0.674	899
44	R	3	115	418.65	NRM	AFD	5	97.43	46.63	0.567	899
44	R	3	125	418.75	NRM	AFD	5	62.09	52.94	0.226	899
44	R	3	135	418.85	NRM	AFD	5	333.91	46.35	0.178	899
44	R	4	15	419.15	NRM	AFD	5	278.51	26.26	0.459	901
44	R	4	25	419.25	NRM	AFD	5	70.17	38.02	0.393	901
44	R	4	35	419.35	NRM	AFD	5	84.44	23.45	0.236	901
44	R	4	45	419.45	NRM	AFD	5	49.33	43	0.083	901
44	R	4	55	419.55	NRM	AFD	5	151.04	75.82	0.118	901
44	R	4	65	419.65	NRM	AFD	5	213.82	52.19	0.279	901
44	R	4	75	419.75	NRM	AFD	5	214.88	45.88	0.486	901
44	R	4	85	419.85	NRM	AFD	5	212.83	52.78	0.244	901
44	R	4	95	419.95	NRM	AFD	5	201.16	68.86	0.207	901
44	R	4	104	420.04	NRM	AFD	5	107.26	42.48	0.36	901
44	R	4	115	420.15	NRM	AFD	5	135.15	63.85	0.172	901
44	R	4	125	420.25	NRM	AFD	5	264.24	29.42	0.327	901
44	R	4	135	420.35	NRM	AFD	5	259.27	46.87	0.254	901
44	R	5	15	420.65	NRM	AFD	5	342.77	66.22	0.194	903
44	R	5	25	420.75	NRM	AFD	5	359.58	82.05	0.125	903
44	R	5	35	420.85	NRM	AFD	5	83.14	70.64	0.073	903
44	R	5	45	420.95	NRM	AFD	5	78.51	7.76	0.386	903
44	R	5	55	421.05	NRM	AFD	5	70.16	79.4	0.172	903
44	R	5	65	421.15	NRM	AFD	5	141.53	43.03	0.25	903
44	R	5	75	421.25	NRM	AFD	5	143.22	42.44	0.211	903
44	R	5	85	421.35	NRM	AFD	5	120.79	38.3	0.211	903
44	R	5	95	421.45	NRM	AFD	5	159.67	48.94	0.193	903
44	R	5	104	421.54	NRM	AFD	5	231.41	-63.66	0.185	903
44	R	5	115	421.65	NRM	AFD	5	354.67	10.64	0.176	903
44	R	5	125	421.75	NRM	AFD	5	112.94	20.84	0.073	903
44	R	5	135	421.85	NRM	AFD	5	352.9	-7.35	0.011	903
44	R	6	15	422.15	NRM	AFD	5	318.83	55.53	0.226	905
44	R	6	25	422.25	NRM	AFD	5	251.27	52.93	0.239	905
44	R	6	35	422.35	NRM	AFD	5	327.64	51.68	0.233	905
44	R	6	45	422.45	NRM	AFD	5	337.61	52.08	0.217	905
44	R	6	55	422.55	NRM	AFD	5	311.6	63.74	0.142	905
44	R	6	65	422.65	NRM	AFD	5	98.2	84.5	0.145	905
44	R	6	75	422.75	NRM	AFD	5	162.81	73.81	0.109	905
44	R	6	85	422.85	NRM	AFD	5	232.37	65.65	0.084	905
44	R	6	95	422.95	NRM	AFD	5	128.79	60.34	0.098	905
44	R	6	104	423.04	NRM	AFD	5	63.88	45.79	0.143	905
44	R	6	115	423.15	NRM	AFD	5	208.91	23.75	0.261	905
44	R	6	125	423.25	NRM	AFD	5	110.55	5.72	0.256	905
44	R	6	135	423.35	NRM	AFD	5	280.48	24.41	0.332	905
46	R	1	15	433.95	NRM	AFD	5	32.49	-24.64	3.294	911
46	R	1	25	434.05	NRM	AFD	5	123.14	19.97	0.074	911
46	R	1	35	434.15	NRM	AFD	5	69.26	41.28	0.303	911
46	R	1	45	434.25	NRM	AFD	5	291.05	43.38	0.524	911
46	R	1	55	434.35	NRM	AFD	5	111.81	14.91	1.325	911
46	R	1	65	434.45	NRM	AFD	5	90.43	8.83	0.9	911
46	R	1	75	434.55	NRM	AFD	5	247.64	49.09	0.243	911
46	R	1	85	434.65	NRM	AFD	5	246.17	65.47	0.133	911
46	R	1	95	434.75	NRM	AFD	5	72.57	33.34	0.242	911
46	R	1	104	434.84	NRM	AFD	5	57.06	56.93	0.166	911
46	R	1	115	434.95	NRM	AFD	5	226.06	66.68	0.098	911
46	R	1	125	435.05	NRM	AFD	5	120.5	-1.37	0.106	911
46	R	1	135	435.15	NRM	AFD	5	57.54	20.05	0.24	911
46	R	2	15	435.45	NRM	AFD	5	239.71	64.12	0.125	913
46	R	2	25	435.55	NRM	AFD	5	116.69	37.23	0.295	913
46	R	2	35	435.65	NRM	AFD	5	111.22	40.25	0.371	913
46	R	2	45	435.75	NRM	AFD	5	295.73	42.6	0.257	913
46	R	2	55	435.85	NRM	AFD	5	149.49	38.61	0.315	913
46	R	2	65	435.95	NRM	AFD	5	140.65	47.61	0.273	913
46	R	2	75	436.05	NRM	AFD	5	269.6	47.2	0.38	913
46	R	2	85	436.15	NRM	AFD	5	262.62	47.92	0.313	913
46	R	2	95	436.25	NRM	AFD	5	231.65	62.97	0.3	913
46	R	2	104	436.34	NRM	AFD	5	144.24	59.38	0.344	913
46	R	2	115	436.45	NRM	AFD	5	155.63	58.4	0.68	913
46	R	2	125	436.55	NRM	AFD	5	67.24	40.97	1.189	913
46	R	2	135	436.65	NRM	AFD	5	339.57	64.26	0.648	913
46	R	3	15	436.95	NRM	AFD	5	35.96	-63.13	0.393	914
46	R	3	25	437.05	NRM	AFD	5	150.77	-64.39	0.502	914
46	R	3	35	437.15	NRM	AFD	5	153.92	-57.95	0.437	914
46	R	3	45	437.25	NRM	AFD	5	75.56	-14.77	0.164	914
46	R	3	55	437.35	NRM	AFD	5	37.51	56.55	0.244	914
46	R	3	65	437.45	NRM	AFD	5	338.7	73.33	0.301	914
46	R	3	75	437.55	NRM	AFD	5	232.01	54.79	0.414	914
46	R	3	85	437.65	NRM	AFD	5	295.05	51.15	0.418	914
46	R	3	95	437.75	NRM	AFD	5	294.09	59.98	0.429	914
46	R	3	104	437.84	NRM	AFD	5	200.36	43.95	0.281	914
46	R	3	115	437.95	NRM	AFD	5	41.25	55.36	0.293	914
46	R	3	125	438.05	NRM	AFD	5	325.57	70.69	0.469	914
46	R	3	135	438.15	NRM	AFD	5	73.37	57.85	0.494	914
46	R	4	15	438.45	NRM	AFD	5	113.51	52.25	0.887	915
46	R	4	25	438.55	NRM	AFD	5	36.45	45.1	0.812	915
46	R	4	35	438.65	NRM	AFD	5	208.1	70.64	0.63	915
46	R	4	45	438.75	NRM	AFD	5	251.49	39.5	0.856	915
46	R	4	55	438.85	NRM	AFD	5	317.75	41.92	0.929	915
46	R	4	65	438.95	NRM	AFD	5	185.03	65	0.51	915
46	R	4	75	439.05	NRM	AFD	5	146.26	41.08	0.486	915
46	R	4	85	439.15	NRM	AFD	5	4.32	20.62	0.084	915
47	R	2	15	445.15	NRM	AFD	5	125.53	20.51	0.301	918
47	R	2	25	445.25	NRM	AFD	5	114.35	-7.87	0.224	918
47	R	2	35	445.35	NRM	AFD	5	325.01	-26.23	0.028	918
47	R	2	45	445.45	NRM	AFD	5	80.96	-11.05	0.014	918
47	R	2	55	445.55	NRM	AFD	5	334.06	-50.06	0.022	918
47	R	2	65	445.65	NRM	AFD	5	311.65	-42.49	0.243	918
47	R	2	75	445.75	NRM	AFD	5	306.23	45.59	0.254	918
47	R	2	85	445.85	NRM	AFD	5	191.05	41.89	0.538	918
47	R	2	95	445.95	NRM	AFD	5	115.41	40.66	0.39	918
47	R	2	104	446.04	NRM	AFD	5	100.39	48.73	0.481	918
47	R	2	115	446.15	NRM	AFD	5	356.96	78.17	0.502	918
47	R	2	125	446.25	NRM	AFD	5	28.05	42.98	0.877	918
47	R	2	135	446.35	NRM	AFD	5	268.75	69.01	0.632	918
47	R	3	15	446.65	NRM	AFD	5	342.27	52.33	0.367	920
47	R	3	25	446.75	NRM	AFD	5	116.49	70.46	0.503	920
47	R	3	35	446.85	NRM	AFD	5	194.56	49.71	0.317	920
47	R	3	45	446.95	NRM	AFD	5	268.85	83.91	0.052	920
47	R	3	55	447.05	NRM	AFD	5	358.38	38.7	0.08	920
47	R	3	65	447.15	NRM	AFD	5	129.1	-7.43	0.2	920
47	R	3	75	447.25	NRM	AFD	5	96.2	-53.52	0.214	920
47	R	3	85	447.35	NRM	AFD	5	29.93	-14.86	0.362	920
47	R	3	95	447.45	NRM	AFD	5	254.46	36.37	0.254	920
47	R	3	104	447.54	NRM	AFD	5	244.48	-19.61	0.447	920
47	R	3	115	447.65	NRM	AFD	5	88.06	6.71	0.344	920
47	R	3	125	447.75	NRM	AFD	5	282.49	-17.29	0.667	920
47	R	3	135	447.85	NRM	AFD	5	5.08	-39.17	0.522	920
47	R	4	15	448.15	NRM	AFD	5	39.35	-39.19	0.06	921
47	R	4	25	448.25	NRM	AFD	5	281.59	0.99	0.047	921
47	R	4	35	448.35	NRM	AFD	5	5.74	-6.14	0.125	921
47	R	4	45	448.45	NRM	AFD	5	254.52	-21.29	0.173	921
47	R	4	55	448.55	NRM	AFD	5	280.19	-36.43	0.477	921
47	R	4	65	448.65	NRM	AFD	5	246.38	-50.25	0.603	921
47	R	4	75	448.75	NRM	AFD	5	301.9	-24.86	0.555	921
47	R	4	85	448.85	NRM	AFD	5	353.16	40.63	0.092	921
47	R	4	95	448.95	NRM	AFD	5	117.56	77.88	0.308	921
47	R	4	104	449.04	NRM	AFD	5	298.44	64.58	0.294	921
47	R	4	115	449.15	NRM	AFD	5	275	58.17	0.588	921
47	R	4	125	449.25	NRM	AFD	5	81.46	67.52	0.975	921
47	R	4	135	449.35	NRM	AFD	5	293.16	60.13	0.861	921
47	R	5	15	449.65	NRM	AFD	5	262.58	46.71	0.796	922
47	R	5	25	449.75	NRM	AFD	5	305.55	40.47	1.002	922
47	R	5	35	449.85	NRM	AFD	5	69.49	54.01	1.173	922
47	R	5	45	449.95	NRM	AFD	5	81.49	40.49	1.334	922
47	R	5	55	450.05	NRM	AFD	5	352.88	65.95	0.893	922
47	R	5	65	450.15	NRM	AFD	5	308.5	48.54	0.583	922
47	R	5	75	450.25	NRM	AFD	5	66.7	54.46	0.578	922
47	R	5	85	450.35	NRM	AFD	5	238.64	76.73	0.315	922
47	R	5	95	450.45	NRM	AFD	5	88.38	66.07	0.274	922
47	R	5	104	450.54	NRM	AFD	5	26.16	72.2	0.291	922
47	R	5	115	450.65	NRM	AFD	5	312.35	80.93	0.308	922
48	R	1	15	453.35	NRM	AFD	5	161.97	-70.91	2.021	923
48	R	1	25	453.45	NRM	AFD	5	301.28	-78.36	3.278	923
48	R	1	35	453.55	NRM	AFD	5	115.86	-83.25	3.33	923
48	R	1	45	453.65	NRM	AFD	5	171.48	-80.34	3.019	923
48	R	1	55	453.75	NRM	AFD	5	99.64	-73.77	2.495	923
48	R	1	65	453.85	NRM	AFD	5	147.8	-60.3	3.133	923
48	R	1	75	453.95	NRM	AFD	5	290.62	-49.22	1.249	923
48	R	1	85	454.05	NRM	AFD	5	50.71	-22.02	0.263	923
48	R	1	95	454.15	NRM	AFD	5	250.12	-50.24	0.361	923
48	R	1	104	454.24	NRM	AFD	5	7.09	-30.25	0.845	923
48	R	1	115	454.35	NRM	AFD	5	49.13	-26.27	1.369	923
48	R	1	125	454.45	NRM	AFD	5	26.02	-28.06	1.132	923
48	R	1	135	454.55	NRM	AFD	5	340.36	-33.23	0.763	923
48	R	2	15	454.85	NRM	AFD	5	261.86	-27.04	0.827	924
48	R	2	25	454.95	NRM	AFD	5	242.57	-19.41	0.462	924
48	R	2	35	455.05	NRM	AFD	5	342.88	-84.29	0.36	924
48	R	2	45	455.15	NRM	AFD	5	345.74	-28.57	1.49	924
48	R	2	55	455.25	NRM	AFD	5	339.09	-21.56	1.024	924
48	R	2	65	455.35	NRM	AFD	5	314.45	-37.25	0.449	924
48	R	2	75	455.45	NRM	AFD	5	51.83	-73.56	0.258	924
48	R	2	85	455.55	NRM	AFD	5	310.13	-34.96	0.585	924
48	R	2	95	455.65	NRM	AFD	5	324.1	-27.93	0.282	924
48	R	2	104	455.74	NRM	AFD	5	120.73	25.02	0.077	924
48	R	2	115	455.85	NRM	AFD	5	270.47	57.77	0.178	924
48	R	2	125	455.95	NRM	AFD	5	237.07	-12.54	0.167	924
48	R	2	135	456.05	NRM	AFD	5	77.18	-25.66	0.768	924
48	R	3	15	456.35	NRM	AFD	5	306.13	-38.44	0.627	925
48	R	3	25	456.45	NRM	AFD	5	107.74	-52.14	0.79	925
48	R	3	35	456.55	NRM	AFD	5	192.79	-78.55	0.613	925
48	R	3	45	456.65	NRM	AFD	5	224.74	-43.2	0.395	925
48	R	3	55	456.75	NRM	AFD	5	63.52	-36.91	0.261	925
48	R	3	65	456.85	NRM	AFD	5	63.74	-57.51	0.09	925
48	R	3	75	456.95	NRM	AFD	5	119.81	-48.46	0.068	925
48	R	3	85	457.05	NRM	AFD	5	313.03	-57.8	0.097	925
48	R	3	95	457.15	NRM	AFD	5	193.44	-64.53	0.101	925
48	R	3	104	457.24	NRM	AFD	5	344.24	-48.08	0.214	925
48	R	3	115	457.35	NRM	AFD	5	79.68	-65.54	0.134	925
48	R	3	125	457.45	NRM	AFD	5	63.63	-74.86	0.053	925
48	R	3	135	457.55	NRM	AFD	5	117.27	-28.84	0.105	925
48	R	4	15	457.85	NRM	AFD	5	62.98	-23.81	0.448	928
48	R	4	25	457.95	NRM	AFD	5	55.66	-43.15	0.263	928
48	R	4	35	458.05	NRM	AFD	5	222.36	-30.16	0.214	928
48	R	4	45	458.15	NRM	AFD	5	146.33	-30.62	0.155	928
48	R	4	55	458.25	NRM	AFD	5	306.74	-18.67	0.357	928
48	R	4	65	458.35	NRM	AFD	5	2.08	-27.36	0.173	928
48	R	4	75	458.45	NRM	AFD	5	28.52	-55.75	0.187	928
48	R	4	85	458.55	NRM	AFD	5	270.06	-24.75	0.343	928
48	R	4	95	458.65	NRM	AFD	5	1.27	-56.94	0.104	928
48	R	4	104	458.74	NRM	AFD	5	258.7	-59.31	0.079	928
48	R	4	115	458.85	NRM	AFD	5	259.68	-29.13	0.062	928
48	R	4	125	458.95	NRM	AFD	5	148.19	-63.5	0.021	928
48	R	4	135	459.05	NRM	AFD	5	45.65	7.76	0.109	928
48	R	5	15	459.35	NRM	AFD	5	133.39	-21.67	0.153	930
48	R	5	25	459.45	NRM	AFD	5	169.54	-35.07	0.243	930
48	R	5	35	459.55	NRM	AFD	5	294	-51.97	0.203	930
48	R	5	45	459.65	NRM	AFD	5	11.34	-34.61	0.157	930
48	R	5	55	459.75	NRM	AFD	5	4.3	-53.98	0.066	930
48	R	5	65	459.85	NRM	AFD	5	239.11	-17.28	0.291	930
48	R	5	75	459.95	NRM	AFD	5	206.64	-19.9	0.23	930
48	R	5	85	460.05	NRM	AFD	5	201.68	-19.58	0.295	930
48	R	5	95	460.15	NRM	AFD	5	181.82	-15.36	0.353	930
48	R	5	104	460.24	NRM	AFD	5	301.79	-65.99	0.175	930
48	R	5	115	460.35	NRM	AFD	5	50.37	-27.78	0.157	930
48	R	5	125	460.45	NRM	AFD	5	304.47	-20.1	0.065	930
48	R	5	135	460.55	NRM	AFD	5	52.74	-26.08	0.062	930
50	R	3	15	475.65	NRM	AFD	5	348.26	21.65	0.149	938
50	R	3	25	475.75	NRM	AFD	5	152.04	-66.65	0.168	938
50	R	3	35	475.85	NRM	AFD	5	40.27	-31.07	0.082	938
50	R	3	45	475.95	NRM	AFD	5	336.15	-18.5	0.129	938
50	R	3	55	476.05	NRM	AFD	5	167.84	-29.94	0.137	938
50	R	3	65	476.15	NRM	AFD	5	273.68	-20.06	0.211	938
50	R	3	75	476.25	NRM	AFD	5	98.25	-7.12	0.096	938
50	R	3	85	476.35	NRM	AFD	5	1.53	-44.59	0.154	938
50	R	3	95	476.45	NRM	AFD	5	247.06	-27.65	0.217	938
50	R	3	104	476.54	NRM	AFD	5	156.45	8.59	0.127	938
50	R	3	115	476.65	NRM	AFD	5	37.65	-37.61	0.142	938
50	R	3	125	476.75	NRM	AFD	5	334.47	-47.84	0.135	938
50	R	3	135	476.85	NRM	AFD	5	316.45	-19.53	0.2	938
50	R	4	15	477.15	NRM	AFD	5	91.39	-17.09	0.239	939
50	R	4	25	477.25	NRM	AFD	5	328.45	-56.02	0.151	939
50	R	4	35	477.35	NRM	AFD	5	330.91	-4.06	0.211	939
50	R	4	45	477.45	NRM	AFD	5	99.85	39.58	0.048	939
50	R	4	55	477.55	NRM	AFD	5	348.17	3.63	0.101	939
50	R	4	65	477.65	NRM	AFD	5	302.33	58.66	0.045	939
50	R	4	75	477.75	NRM	AFD	5	239.42	-1.22	0.094	939
50	R	4	85	477.85	NRM	AFD	5	38.86	-26.25	0.084	939
50	R	4	95	477.95	NRM	AFD	5	35.13	3.63	0.177	939
50	R	4	104	478.04	NRM	AFD	5	328.94	34.52	0.084	939
50	R	4	115	478.15	NRM	AFD	5	49.42	-25.64	0.083	939
50	R	4	125	478.25	NRM	AFD	5	72.86	-53.36	0.215	939
50	R	4	135	478.35	NRM	AFD	5	15.29	-36.3	0.124	939
50	R	5	15	478.65	NRM	AFD	5	245.44	-43.05	0.66	940
50	R	5	25	478.75	NRM	AFD	5	70.08	-22.25	0.294	940
50	R	5	35	478.85	NRM	AFD	5	204.73	-25.94	0.063	940
50	R	5	45	478.95	NRM	AFD	5	2.24	-57.07	0.131	940
50	R	5	55	479.05	NRM	AFD	5	282.33	-56.54	0.186	940
50	R	5	65	479.15	NRM	AFD	5	332.26	-44.17	0.149	940
50	R	5	75	479.25	NRM	AFD	5	332.27	-44.55	0.114	940
50	R	5	85	479.35	NRM	AFD	5	26.89	-22.96	0.199	940
50	R	5	95	479.45	NRM	AFD	5	181.57	-16.68	0.203	940
50	R	5	104	479.54	NRM	AFD	5	278.38	-67.11	0.202	940
50	R	5	115	479.65	NRM	AFD	5	157.8	-68.94	0.14	940
50	R	5	125	479.75	NRM	AFD	5	326.83	-42.72	0.077	940
50	R	5	135	479.85	NRM	AFD	5	83.6	0.45	0.016	940
50	R	6	15	480.15	NRM	AFD	5	288.94	-40.83	0.171	941
50	R	6	25	480.25	NRM	AFD	5	269.42	-32.68	0.056	941
50	R	6	35	480.35	NRM	AFD	5	279.47	1.26	0.032	941
50	R	6	45	480.45	NRM	AFD	5	136.71	-42.04	0.136	941
50	R	6	55	480.55	NRM	AFD	5	151.03	-54.23	0.129	941
50	R	6	65	480.65	NRM	AFD	5	6.57	-74.07	0.093	941
50	R	6	75	480.75	NRM	AFD	5	9.79	-20.56	0.081	941
50	R	6	85	480.85	NRM	AFD	5	299.4	-41.01	0.095	941
50	R	6	95	480.95	NRM	AFD	5	6.96	-52.59	0.081	941
50	R	6	104	481.04	NRM	AFD	5	109.1	-54.39	0.082	941
50	R	6	115	481.15	NRM	AFD	5	43.81	-33.26	0.137	941
50	R	6	125	481.25	NRM	AFD	5	7.53	-29.06	0.099	941
50	R	6	135	481.35	NRM	AFD	5	358.87	-42.46	0.061	941
51	R	1	15	482.25	NRM	AFD	5	47.44	73.67	0.219	942
51	R	1	25	482.35	NRM	AFD	5	27.27	77.35	0.11	942
51	R	1	35	482.45	NRM	AFD	5	334.89	36.99	0.166	942
51	R	1	45	482.55	NRM	AFD	5	331.28	49.28	0.313	942
51	R	1	55	482.65	NRM	AFD	5	174.15	67.53	0.322	942
51	R	1	65	482.75	NRM	AFD	5	81.98	31.76	0.332	942
51	R	1	75	482.85	NRM	AFD	5	2.28	49.8	0.222	942
51	R	1	85	482.95	NRM	AFD	5	133.67	63.11	0.077	942
51	R	1	95	483.05	NRM	AFD	5	216.2	28.8	0.15	942
51	R	1	104	483.14	NRM	AFD	5	4.36	69.67	0.225	942
51	R	1	115	483.25	NRM	AFD	5	285.58	69.8	0.286	942
51	R	1	125	483.35	NRM	AFD	5	276.26	47.36	0.232	942
51	R	1	135	483.45	NRM	AFD	5	40.77	58.76	0.261	942
51	R	2	15	483.75	NRM	AFD	5	317.53	69.3	0.15	943
51	R	2	25	483.85	NRM	AFD	5	332.73	47.72	0.195	943
51	R	2	35	483.95	NRM	AFD	5	246.72	73.34	0.16	943
51	R	2	45	484.05	NRM	AFD	5	122.95	54.6	0.138	943
51	R	2	55	484.15	NRM	AFD	5	41.75	53.72	0.138	943
51	R	2	65	484.25	NRM	AFD	5	8.14	49.99	0.16	943
51	R	2	75	484.35	NRM	AFD	5	71.1	47.47	0.132	943
51	R	2	85	484.45	NRM	AFD	5	62.48	30.67	0.133	943
51	R	2	95	484.55	NRM	AFD	5	332.05	15.57	0.073	943
51	R	2	104	484.64	NRM	AFD	5	282.61	46.12	0.14	943
51	R	2	115	484.75	NRM	AFD	5	243.59	36.7	0.114	943
51	R	2	125	484.85	NRM	AFD	5	222.22	55.93	0.125	943
51	R	2	135	484.95	NRM	AFD	5	229.93	53.32	0.09	943
51	R	3	15	485.25	NRM	AFD	5	35.03	43.01	0.206	944
51	R	3	25	485.35	NRM	AFD	5	330.91	87.83	0.2	944
51	R	3	35	485.45	NRM	AFD	5	63.01	64.35	0.363	944
51	R	3	45	485.55	NRM	AFD	5	343.57	42.56	0.277	944
51	R	3	55	485.65	NRM	AFD	5	335.01	24.91	0.409	944
51	R	3	65	485.75	NRM	AFD	5	52.47	16.75	0.4	944
51	R	3	75	485.85	NRM	AFD	5	216.83	68.38	0.224	944
51	R	3	85	485.95	NRM	AFD	5	216.1	45.97	0.347	944
51	R	3	95	486.05	NRM	AFD	5	209.64	32.75	0.31	944
51	R	3	104	486.14	NRM	AFD	5	229.51	63.22	0.265	944
51	R	3	115	486.25	NRM	AFD	5	179.47	55.63	0.267	944
51	R	3	125	486.35	NRM	AFD	5	327.23	67.89	0.24	944
51	R	3	135	486.45	NRM	AFD	5	3.73	27.39	0.42	944
51	R	4	15	486.75	NRM	AFD	5	328.02	64.81	0.358	945
51	R	4	25	486.85	NRM	AFD	5	312.02	64.06	0.409	945
51	R	4	35	486.95	NRM	AFD	5	312.75	58.69	0.494	945
51	R	4	45	487.05	NRM	AFD	5	301.46	57.04	0.442	945
51	R	4	55	487.15	NRM	AFD	5	290.73	64	0.394	945
51	R	4	65	487.25	NRM	AFD	5	81.12	39.83	0.355	945
51	R	4	75	487.35	NRM	AFD	5	334.22	37.45	0.287	945
51	R	4	85	487.45	NRM	AFD	5	244.47	54.84	0.324	945
51	R	4	95	487.55	NRM	AFD	5	252.24	62.3	0.388	945
51	R	4	104	487.64	NRM	AFD	5	336.39	56.39	0.381	945
51	R	4	115	487.75	NRM	AFD	5	43.39	45.68	0.446	945
51	R	4	125	487.85	NRM	AFD	5	251.25	62.42	0.403	945
51	R	4	135	487.95	NRM	AFD	5	210.67	62.65	0.399	945
51	R	5	15	488.25	NRM	AFD	5	231.61	64.96	0.46	946
51	R	5	25	488.35	NRM	AFD	5	296.32	59.99	0.466	946
51	R	5	35	488.45	NRM	AFD	5	10.64	62.31	0.516	946
51	R	5	45	488.55	NRM	AFD	5	206.28	74.94	0.306	946
51	R	5	55	488.65	NRM	AFD	5	336.01	61.78	0.329	946
51	R	5	65	488.75	NRM	AFD	5	44.26	54.21	0.385	946
51	R	5	75	488.85	NRM	AFD	5	356.5	75.22	0.236	946
51	R	5	85	488.95	NRM	AFD	5	111.86	57.32	0.285	946
51	R	5	95	489.05	NRM	AFD	5	2.86	76.34	0.269	946
51	R	5	104	489.14	NRM	AFD	5	323.03	69.32	0.244	946
51	R	5	115	489.25	NRM	AFD	5	110.99	56.64	0.258	946
51	R	5	125	489.35	NRM	AFD	5	157.95	16.26	0.171	946
51	R	5	135	489.45	NRM	AFD	5	329.36	52.81	0.143	946
51	R	6	15	489.75	NRM	AFD	5	340.88	48.76	0.128	947
51	R	6	25	489.85	NRM	AFD	5	157.98	64.05	0.13	947
51	R	6	35	489.95	NRM	AFD	5	72.4	75.2	0.094	947
51	R	6	45	490.05	NRM	AFD	5	213.88	81.92	0.056	947
51	R	6	55	490.15	NRM	AFD	5	256.78	15.72	0.04	947
51	R	6	65	490.25	NRM	AFD	5	14.64	-39.85	0.053	947
51	R	6	75	490.35	NRM	AFD	5	21.18	-3.23	0.153	947
51	R	6	85	490.45	NRM	AFD	5	53.56	-18.24	0.056	947
51	R	6	95	490.55	NRM	AFD	5	96.7	-37.51	0.18	947
51	R	6	104	490.64	NRM	AFD	5	236.37	-43.71	0.095	947
51	R	6	115	490.75	NRM	AFD	5	180.91	-32.29	0.141	947
51	R	6	125	490.85	NRM	AFD	5	128.47	-12.76	0.172	947
51	R	6	135	490.95	NRM	AFD	5	335.71	1.91	0.125	947
52	R	4	15	496.45	NRM	AFD	5	226.93	-44.57	0.117	948
52	R	4	25	496.55	NRM	AFD	5	81.91	-7.46	0.041	948
52	R	4	35	496.65	NRM	AFD	5	344.53	-34.64	0.173	948
52	R	4	45	496.75	NRM	AFD	5	280.32	-40.01	0.472	948
52	R	4	55	496.85	NRM	AFD	5	152.77	-52	0.503	948
52	R	4	65	496.95	NRM	AFD	5	200.76	-54.52	0.337	948
52	R	4	75	497.05	NRM	AFD	5	210.29	-41.84	0.191	948
52	R	4	85	497.15	NRM	AFD	5	56.5	-11.27	0.451	948
52	R	4	95	497.25	NRM	AFD	5	1.33	-0.65	0.236	948
52	R	4	104	497.34	NRM	AFD	5	25.54	2.32	0.275	948
52	R	4	115	497.45	NRM	AFD	5	59.86	-14.2	0.143	948
52	R	4	125	497.55	NRM	AFD	5	255.9	-30.33	0.144	948
52	R	4	135	497.65	NRM	AFD	5	228.35	-18.65	0.214	948
52	R	5	15	497.95	NRM	AFD	5	89.95	-45.55	0.366	949
52	R	5	25	498.05	NRM	AFD	5	39.12	-61.23	0.152	949
52	R	5	35	498.15	NRM	AFD	5	243.58	-56.95	0.139	949
52	R	5	45	498.25	NRM	AFD	5	267.77	-39.22	0.335	949
52	R	5	55	498.35	NRM	AFD	5	285.35	-51.56	0.513	949
52	R	5	65	498.45	NRM	AFD	5	54.01	-79.48	0.391	949
52	R	5	75	498.55	NRM	AFD	5	9.12	-30.52	0.581	949
52	R	5	85	498.65	NRM	AFD	5	236.11	-54.37	0.277	949
52	R	5	95	498.75	NRM	AFD	5	175.77	-31.46	0.228	949
52	R	5	104	498.84	NRM	AFD	5	50.77	-11.54	0.332	949
52	R	5	115	498.95	NRM	AFD	5	261.61	-27.51	0.347	949
52	R	5	125	499.05	NRM	AFD	5	215.81	-18.92	0.271	949
52	R	5	135	499.15	NRM	AFD	5	141.06	-27.19	0.211	949
52	R	6	15	499.45	NRM	AFD	5	84.9	-62.78	0.348	950
52	R	6	25	499.55	NRM	AFD	5	354.71	-57.58	0.349	950
52	R	6	35	499.65	NRM	AFD	5	286.79	-19.52	0.33	950
52	R	6	45	499.75	NRM	AFD	5	323.68	8.75	0.115	950
52	R	6	55	499.85	NRM	AFD	5	87.37	4.88	0.22	950
52	R	6	65	499.95	NRM	AFD	5	304.41	-11.79	0.152	950
52	R	6	75	500.05	NRM	AFD	5	349.76	-22.2	0.046	950
52	R	6	85	500.15	NRM	AFD	5	177.96	-29.27	0.514	950
52	R	6	95	500.25	NRM	AFD	5	113.8	-62.27	0.399	950
52	R	6	104	500.34	NRM	AFD	5	142.19	-55.78	0.454	950
52	R	6	115	500.45	NRM	AFD	5	80.93	-82	0.307	950
52	R	6	125	500.55	NRM	AFD	5	111.32	-39.24	0.253	950
52	R	6	135	500.65	NRM	AFD	5	88.69	-27.43	0.199	950
52	R	7	15	500.95	NRM	AFD	5	50.74	30.15	0.149	951
52	R	7	25	501.05	NRM	AFD	5	248.34	13.5	0.146	951
52	R	7	35	501.15	NRM	AFD	5	276.65	-35.75	0.331	951
53	R	1	15	501.55	NRM	AFD	5	28.51	23.74	0.074	952
53	R	1	25	501.65	NRM	AFD	5	271.1	5.83	0.178	952
53	R	1	35	501.75	NRM	AFD	5	12.45	-26.24	0.103	952
53	R	1	45	501.85	NRM	AFD	5	3.14	27.23	0.195	952
53	R	1	55	501.95	NRM	AFD	5	55.44	46.25	0.151	952
53	R	1	65	502.05	NRM	AFD	5	235.54	77.61	0.095	952
53	R	1	75	502.15	NRM	AFD	5	6.81	21.83	0.083	952
53	R	1	85	502.25	NRM	AFD	5	140.02	15.11	0.033	952
53	R	1	95	502.35	NRM	AFD	5	259.37	22.24	0.104	952
53	R	1	104	502.44	NRM	AFD	5	7.27	21.89	0.109	952
53	R	1	115	502.55	NRM	AFD	5	2.81	5.68	0.127	952
53	R	1	125	502.65	NRM	AFD	5	291.75	0.57	0.173	952
53	R	1	135	502.75	NRM	AFD	5	198.79	-0.16	0.205	952
53	R	2	10	503	NRM	AFD	5	200.7	-21.5	0.1182	954
53	R	2	15	503.05	NRM	AFD	5	227.11	-14.94	0.134	953
53	R	2	20	503.1	NRM	AFD	5	349.8	4.6	2.394	954
53	R	2	25	503.15	NRM	AFD	5	310.99	-49.5	0.193	953
53	R	2	30	503.2	NRM	AFD	5	307.3	13.7	2.646	954
53	R	2	35	503.25	NRM	AFD	5	106.42	-78.61	0.219	953
53	R	2	40	503.3	NRM	AFD	5	87.8	21.1	2.474	954
53	R	2	45	503.35	NRM	AFD	5	238.39	-30.71	0.351	953
53	R	2	50	503.4	NRM	AFD	5	335.6	13.8	3.039	954
53	R	2	55	503.45	NRM	AFD	5	322.05	-5.78	0.261	953
53	R	2	60	503.5	NRM	AFD	5	208.2	41	1.695	954
53	R	2	65	503.55	NRM	AFD	5	43.37	17.59	0.206	953
53	R	2	70	503.6	NRM	AFD	5	165.6	16.4	2.675	954
53	R	2	75	503.65	NRM	AFD	5	225.27	17.72	0.22	953
53	R	2	80	503.7	NRM	AFD	5	343.1	15.6	2.836	954
53	R	2	85	503.75	NRM	AFD	5	256.05	31.33	0.12	953
53	R	2	90	503.8	NRM	AFD	5	351.7	20.2	2.22	954
53	R	2	95	503.85	NRM	AFD	5	352.51	42.17	0.271	953
53	R	2	100	503.9	NRM	AFD	5	188.1	14.4	1.021	954
53	R	2	104	503.94	NRM	AFD	5	323.39	0.94	0.308	953
53	R	2	110	504	NRM	AFD	5	216.6	0.3	1.318	954
53	R	2	115	504.05	NRM	AFD	5	29.99	9.65	0.072	953
53	R	2	120	504.1	NRM	AFD	5	151.7	-5.6	0.3389	954
53	R	2	125	504.15	NRM	AFD	5	220.41	7.45	0.281	953
53	R	2	130	504.2	NRM	AFD	5	320.4	-6.7	1.296	954
53	R	2	135	504.25	NRM	AFD	5	189.81	-2.83	0.297	953
53	R	2	140	504.3	NRM	AFD	5	353.3	2.9	1.319	954
53	R	3	10	504.5	NRM	AFD	5	168.4	17.5	0.91	955
53	R	3	15	504.55	NRM	AFD	5	331.08	-25.94	0.289	955
53	R	3	20	504.6	NRM	AFD	5	267.8	40.5	0.7719	955
53	R	3	25	504.65	NRM	AFD	5	221.9	-26.86	0.35	955
53	R	3	30	504.7	NRM	AFD	5	319.4	25.7	1.461	955
53	R	3	35	504.75	NRM	AFD	5	71.25	-72.05	0.201	955
53	R	3	40	504.8	NRM	AFD	5	92.4	67.9	0.8377	955
53	R	3	45	504.85	NRM	AFD	5	351.3	-13.39	0.271	955
53	R	3	50	504.9	NRM	AFD	5	188.8	11	1.189	955
53	R	3	55	504.95	NRM	AFD	5	9.82	3.45	0.271	955
53	R	3	60	505	NRM	AFD	5	169.9	-2.9	1.219	955
53	R	3	65	505.05	NRM	AFD	5	80.09	4.03	0.352	955
53	R	3	70	505.1	NRM	AFD	5	99.5	-3.7	1.528	955
53	R	3	75	505.15	NRM	AFD	5	350.43	10.76	0.171	955
53	R	3	80	505.2	NRM	AFD	5	184.4	-11.3	0.7957	955
53	R	3	85	505.25	NRM	AFD	5	320.65	-5.45	0.468	955
53	R	3	90	505.3	NRM	AFD	5	219.6	5.2	2.088	955
53	R	3	95	505.35	NRM	AFD	5	58.79	-19.19	0.113	955
53	R	3	100	505.4	NRM	AFD	5	105.9	15.6	0.5431	955
53	R	3	104	505.44	NRM	AFD	5	129.39	-21.92	0.372	955
53	R	3	110	505.5	NRM	AFD	5	48.6	22	1.588	955
53	R	3	115	505.55	NRM	AFD	5	139.94	-37.54	0.275	955
53	R	3	120	505.6	NRM	AFD	5	37.3	35.5	1.216	955
53	R	3	125	505.65	NRM	AFD	5	29.16	-29.46	0.247	955
53	R	3	130	505.7	NRM	AFD	5	151.7	29.3	1.076	955
53	R	3	135	505.75	NRM	AFD	5	97.58	-28.82	0.26	955
53	R	3	140	505.8	NRM	AFD	5	86.3	26.8	1.128	955
53	R	4	10	506	NRM	AFD	5	163.5	-28.2	0.2165	956
53	R	4	20	506.1	NRM	AFD	5	204.9	-35.6	0.5199	956
53	R	4	30	506.2	NRM	AFD	5	170.3	-63.1	0.5062	956
53	R	4	40	506.3	NRM	AFD	5	332.5	-74.1	0.4385	956
53	R	4	50	506.4	NRM	AFD	5	57.7	-49	0.7081	956
53	R	4	60	506.5	NRM	AFD	5	74.2	-60.2	0.3727	956
53	R	4	70	506.6	NRM	AFD	5	126.3	-34.1	0.3888	956
53	R	4	80	506.7	NRM	AFD	5	42	-22.6	0.3322	956
53	R	4	90	506.8	NRM	AFD	5	319.6	-42.3	0.1074	956
53	R	4	100	506.9	NRM	AFD	5	156.3	37.7	0.389	956
53	R	4	110	507	NRM	AFD	5	291.8	53.3	0.631	956
53	R	4	120	507.1	NRM	AFD	5	209.3	14.5	0.9726	956
53	R	4	130	507.2	NRM	AFD	5	123.4	24.3	0.5869	956
53	R	5	15	507.55	NRM	AFD	5	356.25	-4.78	0.192	957
53	R	5	25	507.65	NRM	AFD	5	330.28	-11.36	0.343	957
53	R	5	35	507.75	NRM	AFD	5	355.94	4.77	0.267	957
53	R	5	45	507.85	NRM	AFD	5	312.68	15.99	0.202	957
53	R	5	55	507.95	NRM	AFD	5	46.85	30.97	0.132	957
53	R	5	65	508.05	NRM	AFD	5	336.78	10.06	0.132	957
53	R	5	75	508.15	NRM	AFD	5	31	7.67	0.086	957
53	R	5	85	508.25	NRM	AFD	5	20.87	21.27	0.06	957
53	R	5	95	508.35	NRM	AFD	5	356.42	50.5	0.053	957
53	R	5	104	508.44	NRM	AFD	5	307.28	-7.05	0.181	957
54	R	1	10	511.2	NRM	AFD	5	154.8	49.4	0.5554	958
54	R	1	20	511.3	NRM	AFD	5	102.4	-53.7	0.3636	958
54	R	1	30	511.4	NRM	AFD	5	343.3	-22.5	1.573	958
54	R	1	40	511.5	NRM	AFD	5	127.8	57.4	0.2987	958
54	R	1	50	511.6	NRM	AFD	5	97.9	44.6	0.5909	958
54	R	1	60	511.7	NRM	AFD	5	73.8	20	0.7704	958
54	R	1	70	511.8	NRM	AFD	5	97.1	62.3	0.5625	958
54	R	1	80	511.9	NRM	AFD	5	137.6	-15	0.7501	958
54	R	1	90	512	NRM	AFD	5	108.5	-3.1	1.089	958
54	R	1	100	512.1	NRM	AFD	5	324.7	16.6	0.7662	958
54	R	1	110	512.2	NRM	AFD	5	292	13.7	1.295	958
54	R	1	120	512.3	NRM	AFD	5	36.3	-15.6	1.118	958
54	R	1	130	512.4	NRM	AFD	5	31.6	20.5	1.068	958
54	R	5	10	517.2	NRM	AFD	5	195.7	-27.2	0.4632	959
54	R	5	20	517.3	NRM	AFD	5	176.5	-14	0.4452	959
54	R	5	30	517.4	NRM	AFD	5	281.2	11.9	0.5306	959
54	R	5	40	517.5	NRM	AFD	5	125.4	21.3	0.189	959
54	R	5	50	517.6	NRM	AFD	5	234.1	-5.4	0.5795	959
54	R	5	60	517.7	NRM	AFD	5	282.3	2	0.2813	959
54	R	5	70	517.8	NRM	AFD	5	283	13.9	0.1567	959
54	R	5	80	517.9	NRM	AFD	5	338	19.4	0.7017	959
54	R	5	90	518	NRM	AFD	5	55.2	40.6	1.25	959
54	R	5	100	518.1	NRM	AFD	5	161.5	34.7	1.365	959
54	R	5	110	518.2	NRM	AFD	5	309.4	59.1	0.4516	959
54	R	5	120	518.3	NRM	AFD	5	281.9	8.4	1.29	959
54	R	5	130	518.4	NRM	AFD	5	41.5	-1.4	1.089	959
62	R	1	15	598.25	NRM	AFD	5	77.8	-27.29	0.633	961
62	R	1	25	598.35	NRM	AFD	5	55.51	-67.07	1.618	961
62	R	1	35	598.45	NRM	AFD	5	262.82	-21.68	2.3	961
62	R	1	45	598.55	NRM	AFD	5	260.82	-54.78	1.488	961
62	R	1	55	598.65	NRM	AFD	5	301.43	-65.39	2.378	961
62	R	1	65	598.75	NRM	AFD	5	96.82	-62.09	3.556	961
62	R	1	75	598.85	NRM	AFD	5	33.56	-56.24	4.645	961
62	R	1	85	598.95	NRM	AFD	5	26.39	-36.66	4.643	961
62	R	1	95	599.05	NRM	AFD	5	22.84	-59.02	2.423	961
62	R	1	104	599.14	NRM	AFD	5	325.33	-72.71	2.893	961
62	R	1	115	599.25	NRM	AFD	5	23.46	-74.17	3.732	961
62	R	1	125	599.35	NRM	AFD	5	30	-60.78	4.493	961
62	R	1	135	599.45	NRM	AFD	5	29.1	-64.33	4.265	961
62	R	2	15	599.75	NRM	AFD	5	315.85	-58.76	5.149	963
62	R	2	25	599.85	NRM	AFD	5	345.84	-54.41	9.494	963
62	R	2	35	599.95	NRM	AFD	5	329.08	-59.53	6.584	963
62	R	2	45	600.05	NRM	AFD	5	123.26	-55.23	4.748	963
62	R	2	55	600.15	NRM	AFD	5	353.96	-28.75	3.086	963
62	R	2	65	600.25	NRM	AFD	5	14.6	33.88	6.227	963
62	R	2	75	600.35	NRM	AFD	5	57.04	-41.76	5.18	963
62	R	2	85	600.45	NRM	AFD	5	43.67	-61.96	2.975	963
62	R	2	95	600.55	NRM	AFD	5	185.9	-57.12	2.962	963
62	R	2	104	600.64	NRM	AFD	5	242.27	-42.01	2.542	963
62	R	2	115	600.75	NRM	AFD	5	79.85	-60.1	1.776	963
62	R	2	125	600.85	NRM	AFD	5	169.9	-65.77	2.259	963
62	R	2	135	600.95	NRM	AFD	5	174.53	-60.25	2.957	963
62	R	3	15	601.25	NRM	AFD	5	283.15	-69.59	1.826	965
62	R	3	25	601.35	NRM	AFD	5	173.75	-56.02	2.714	965
62	R	3	35	601.45	NRM	AFD	5	173.9	-51.26	3.057	965
62	R	3	45	601.55	NRM	AFD	5	178.94	-66.56	2.775	965
62	R	3	55	601.65	NRM	AFD	5	287.03	-53.47	4.268	965
62	R	3	65	601.75	NRM	AFD	5	289.41	-58	3.32	965
62	R	3	75	601.85	NRM	AFD	5	322.75	-67.41	1.465	965
62	R	3	85	601.95	NRM	AFD	5	302.24	-50.69	2.793	965
62	R	3	95	602.05	NRM	AFD	5	123.82	-68.24	2.748	965
62	R	3	104	602.14	NRM	AFD	5	90.33	-56.86	3.198	965
62	R	3	115	602.25	NRM	AFD	5	140.67	-57.83	2.733	965
62	R	3	125	602.35	NRM	AFD	5	237.23	-62.19	3.615	965
62	R	3	135	602.45	NRM	AFD	5	67.18	-67.66	5.048	965
62	R	4	15	602.75	NRM	AFD	5	270.22	-69.32	3.307	967
62	R	4	25	602.85	NRM	AFD	5	145.31	-61.76	3.128	967
62	R	4	35	602.95	NRM	AFD	5	194.11	-59.27	4.458	967
62	R	4	45	603.05	NRM	AFD	5	188.87	-69.64	5.094	967
62	R	4	55	603.15	NRM	AFD	5	136.73	-68.12	4.939	967
62	R	4	65	603.25	NRM	AFD	5	112.77	-66.1	5.8	967
62	R	4	75	603.35	NRM	AFD	5	97.06	-65.41	4.563	967
62	R	4	85	603.45	NRM	AFD	5	90.71	-71.63	2.867	967
62	R	4	95	603.55	NRM	AFD	5	175.69	-68.34	2.427	967
62	R	4	104	603.64	NRM	AFD	5	163.52	-71.04	2.522	967
62	R	4	115	603.75	NRM	AFD	5	87.63	-69.48	2.013	967
62	R	4	125	603.85	NRM	AFD	5	79.02	-69.73	1.565	967
62	R	4	135	603.95	NRM	AFD	5	178.05	9.74	0.645	967
62	R	5	15	604.25	NRM	AFD	5	59.7	63.02	3.276	969
62	R	5	25	604.35	NRM	AFD	5	68.97	71.82	3.831	969
62	R	5	35	604.45	NRM	AFD	5	143.58	76.79	3.821	969
62	R	5	45	604.55	NRM	AFD	5	100.55	82.27	3.188	969
62	R	5	55	604.65	NRM	AFD	5	352.13	63.78	3.529	969
62	R	5	65	604.75	NRM	AFD	5	20.43	70.49	4.534	969
62	R	5	75	604.85	NRM	AFD	5	312.79	83.56	2.592	969
62	R	5	85	604.95	NRM	AFD	5	103.31	62.84	1.773	969
62	R	5	95	605.05	NRM	AFD	5	125.75	74.24	2.178	969
62	R	5	104	605.14	NRM	AFD	5	68.89	56.64	2.912	969
62	R	5	115	605.25	NRM	AFD	5	149.4	71.4	3.646	969
62	R	5	125	605.35	NRM	AFD	5	273.13	-13.39	0.295	969
62	R	5	135	605.45	NRM	AFD	5	46.06	-18.09	0.04	969
62	R	6	15	605.75	NRM	AFD	5	18.42	73.8	1.483	971
62	R	6	25	605.85	NRM	AFD	5	347.94	63.15	3.111	971
62	R	6	35	605.95	NRM	AFD	5	336	74.08	6.048	971
62	R	6	45	606.05	NRM	AFD	5	337.74	70.5	8.794	971
63	R	1	15	607.95	NRM	AFD	5	243.1	77.3	2.008	973
63	R	1	25	608.05	NRM	AFD	5	93.21	87.04	3.105	973
63	R	1	35	608.15	NRM	AFD	5	34.42	67.82	4.93	973
63	R	1	45	608.25	NRM	AFD	5	212.96	59.9	4.684	973
63	R	1	55	608.35	NRM	AFD	5	7.29	73.09	4.614	973
63	R	1	65	608.45	NRM	AFD	5	56.64	68.07	7.258	973
63	R	1	75	608.55	NRM	AFD	5	152.98	82.04	6.984	973
63	R	1	85	608.65	NRM	AFD	5	134.06	75.65	3.739	973
63	R	1	95	608.75	NRM	AFD	5	346.19	69.96	3.757	973
63	R	1	104	608.84	NRM	AFD	5	86.55	81.06	5.763	973
63	R	1	115	608.95	NRM	AFD	5	103.87	68.16	4.58	973
63	R	1	125	609.05	NRM	AFD	5	327.26	65.89	2.541	973
63	R	1	135	609.15	NRM	AFD	5	16.65	45.07	1.055	973
63	R	2	15	609.45	NRM	AFD	5	294.22	84.97	4.276	975
63	R	2	25	609.55	NRM	AFD	5	282.09	55.6	5.131	975
63	R	2	35	609.65	NRM	AFD	5	242.26	32.93	6.374	975
63	R	2	45	609.75	NRM	AFD	5	80.41	63.97	1.858	975
63	R	2	55	609.85	NRM	AFD	5	324.16	69.39	2.435	975
63	R	2	65	609.95	NRM	AFD	5	35.88	51.98	4.311	975
63	R	2	75	610.05	NRM	AFD	5	215.38	34.47	0.976	975
64	R	1	15	617.65	NRM	AFD	5	115.09	29.96	2.979	976
64	R	1	25	617.75	NRM	AFD	5	312.25	30.81	2.921	976
64	R	1	35	617.85	NRM	AFD	5	44.96	32.8	9.925	976
64	R	1	45	617.95	NRM	AFD	5	87.88	-11.91	14.41	976
64	R	1	55	618.05	NRM	AFD	5	329.3	-42.45	6.233	976
64	R	1	65	618.15	NRM	AFD	5	359.11	-18.85	5.7	976
64	R	1	75	618.25	NRM	AFD	5	5.52	11.08	1.398	976
64	R	1	85	618.35	NRM	AFD	5	83.71	-24.55	2.197	976
64	R	1	95	618.45	NRM	AFD	5	286.25	-23.89	5.41	976
64	R	1	104	618.54	NRM	AFD	5	265.69	-30.94	1.655	976
64	R	1	115	618.65	NRM	AFD	5	24.47	4.23	1.925	976
64	R	1	125	618.75	NRM	AFD	5	27.64	11.67	1.61	976
64	R	1	135	618.85	NRM	AFD	5	357.09	-67.91	0.666	976
64	R	2	15	619.15	NRM	AFD	5	274.13	-10.21	7.377	977
64	R	2	25	619.25	NRM	AFD	5	59.12	-71.6	4.574	977
64	R	2	35	619.35	NRM	AFD	5	324.5	-59.13	4.773	977
64	R	2	45	619.45	NRM	AFD	5	29.86	4.24	2.546	977
64	R	2	55	619.55	NRM	AFD	5	184.88	-57.4	0.97	977
64	R	2	65	619.65	NRM	AFD	5	343.21	49.44	3.552	977
64	R	2	75	619.75	NRM	AFD	5	76.28	71.88	7.211	977
64	R	2	85	619.85	NRM	AFD	5	104.71	46.62	3.295	977
64	R	2	95	619.95	NRM	AFD	5	312.39	4.92	4.101	977
64	R	2	104	620.04	NRM	AFD	5	21.1	48.34	9.916	977
64	R	2	115	620.15	NRM	AFD	5	253.38	16.88	6.217	977
64	R	2	125	620.25	NRM	AFD	5	186.61	35.82	3.796	977
64	R	2	135	620.35	NRM	AFD	5	140.09	41.53	9.281	977
64	R	3	15	620.65	NRM	AFD	5	103.72	-27.81	5.816	978
64	R	3	25	620.75	NRM	AFD	5	224.91	71.23	1.649	978
64	R	3	35	620.85	NRM	AFD	5	70.08	71.05	0.903	978
64	R	3	45	620.95	NRM	AFD	5	34.05	57.22	2.77	978
64	R	3	55	621.05	NRM	AFD	5	41.76	61.1	2.475	978
64	R	3	65	621.15	NRM	AFD	5	38.27	61.96	2.989	978
64	R	3	75	621.25	NRM	AFD	5	7.52	63.06	1.392	978
64	R	3	85	621.35	NRM	AFD	5	23.43	43.73	0.888	978
65	R	1	10	627.3	NRM	AFD	5	70.1	32.8	8.32	979
65	R	1	20	627.4	NRM	AFD	5	115.4	29.5	33.43	979
65	R	1	30	627.5	NRM	AFD	5	15.5	18.9	46.9	979
65	R	1	40	627.6	NRM	AFD	5	11.1	26.2	67.06	979
65	R	1	50	627.7	NRM	AFD	5	301.1	33.9	38.9	979
65	R	1	60	627.8	NRM	AFD	5	151.6	1.6	27.3	979
65	R	1	70	627.9	NRM	AFD	5	167.7	5.2	17.71	979
65	R	1	80	628	NRM	AFD	5	173	8.5	25.48	979
65	R	1	90	628.1	NRM	AFD	5	280.8	-2.8	23.19	979
65	R	1	100	628.2	NRM	AFD	5	139.2	37.9	41.35	979
65	R	1	110	628.3	NRM	AFD	5	204.9	53.5	17.76	979
65	R	1	120	628.4	NRM	AFD	5	112.6	32.6	16.34	979
65	R	1	130	628.5	NRM	AFD	5	148.5	21	22.41	979
66	R	1	10	636.9	NRM	AFD	5	82	33.2	1.02	981
66	R	1	15	636.95	NRM	AFD	5	75.89	12.58	1.339	980
66	R	1	20	637	NRM	AFD	5	110.4	-9.4	5.909	981
66	R	1	25	637.05	NRM	AFD	5	333.54	37.25	1.883	980
66	R	1	30	637.1	NRM	AFD	5	206.2	-31.7	8.493	981
66	R	1	35	637.15	NRM	AFD	5	19.81	72.59	0.35	980
66	R	1	40	637.2	NRM	AFD	5	154.4	-68.9	1.423	981
66	R	1	45	637.25	NRM	AFD	5	296.14	71.45	0.56	980
66	R	1	50	637.3	NRM	AFD	5	241.3	-69.6	2.272	981
66	R	1	55	637.35	NRM	AFD	5	254.09	32.41	0.194	980
66	R	1	60	637.4	NRM	AFD	5	282.4	-30	0.795	981
66	R	1	65	637.45	NRM	AFD	5	192.06	-10.05	0.247	980
66	R	1	70	637.5	NRM	AFD	5	346.8	10.5	1.052	981
66	R	1	75	637.55	NRM	AFD	5	237.5	-6.24	0.315	980
66	R	1	80	637.6	NRM	AFD	5	302.9	6	1.302	981
66	R	1	85	637.65	NRM	AFD	5	22.62	21	0.375	980
66	R	1	90	637.7	NRM	AFD	5	157.3	-18	1.697	981
66	R	1	95	637.75	NRM	AFD	5	21.93	-0.56	1.048	980
66	R	1	100	637.8	NRM	AFD	5	157.9	0.5	4.713	981
66	R	1	104	637.84	NRM	AFD	5	123.26	-34.04	0.355	980
66	R	1	110	637.9	NRM	AFD	5	56.6	31.2	1.584	981
66	R	1	115	637.95	NRM	AFD	5	164.74	-13.36	0.466	980
66	R	1	120	638	NRM	AFD	5	15.9	12.5	2.007	981
66	R	1	125	638.05	NRM	AFD	5	312.85	27.12	0.077	980
66	R	1	130	638.1	NRM	AFD	5	221	-24.9	0.356	981
66	R	1	135	638.15	NRM	AFD	5	244.25	65.44	1.479	980
66	R	1	140	638.2	NRM	AFD	5	295.2	-64.2	5.997	981
66	R	2	15	638.45	NRM	AFD	5	288.88	30.11	1.622	982
66	R	2	25	638.55	NRM	AFD	5	300.78	71.78	0.653	982
66	R	2	35	638.65	NRM	AFD	5	320.4	0.16	0.265	982
66	R	2	45	638.75	NRM	AFD	5	245.41	-63.42	0.095	982
66	R	2	55	638.85	NRM	AFD	5	11.84	-37.68	0.243	982
66	R	2	65	638.95	NRM	AFD	5	79.3	-21.67	0.284	982
66	R	2	75	639.05	NRM	AFD	5	292.18	32.57	0.213	982
66	R	2	85	639.15	NRM	AFD	5	39.72	37.72	0.465	982
66	R	2	95	639.25	NRM	AFD	5	240.59	20.02	2.304	982
66	R	2	104	639.34	NRM	AFD	5	110.68	3.92	0.38	982
66	R	2	115	639.45	NRM	AFD	5	348.38	35.2	1.234	982
66	R	2	125	639.55	NRM	AFD	5	339.76	41.19	0.401	982
66	R	2	135	639.65	NRM	AFD	5	149.04	3.34	0.045	982
66	R	3	10	639.9	NRM	AFD	5	19.8	40.1	5.57	984
66	R	3	15	639.95	NRM	AFD	5	274.53	-7.64	3.055	983
66	R	3	20	640	NRM	AFD	5	265	40.3	17.68	984
66	R	3	25	640.05	NRM	AFD	5	91.37	77.31	2.259	983
66	R	3	30	640.1	NRM	AFD	5	90.3	21.5	2.306	984
66	R	3	35	640.15	NRM	AFD	5	129.88	-3.31	0.483	983
66	R	3	40	640.2	NRM	AFD	5	47	3.2	2.13	984
66	R	3	45	640.25	NRM	AFD	5	40.38	-46.26	0.855	983
66	R	3	50	640.3	NRM	AFD	5	142.5	43.8	3.594	984
66	R	3	55	640.35	NRM	AFD	5	40.36	-21.39	0.771	983
66	R	3	60	640.4	NRM	AFD	5	140.9	19.5	3.362	984
66	R	3	65	640.45	NRM	AFD	5	25.38	29.24	0.371	983
66	R	3	70	640.5	NRM	AFD	5	160.3	-26.4	1.659	984
66	R	3	75	640.55	NRM	AFD	5	301.16	16.14	0.615	983
66	R	3	80	640.6	NRM	AFD	5	238.1	-14.5	2.854	984
67	R	1	10	646.6	NRM	AFD	5	230.8	-41.2	1.62	986
67	R	1	15	646.65	NRM	AFD	5	209.98	-39.24	1.01	985
67	R	1	20	646.7	NRM	AFD	5	330.5	36.7	4.397	986
67	R	1	25	646.75	NRM	AFD	5	258.81	-40.09	2.052	985
67	R	1	30	646.8	NRM	AFD	5	280.5	37.5	8.789	986
67	R	1	35	646.85	NRM	AFD	5	226.42	-50.06	1.75	985
67	R	1	40	646.9	NRM	AFD	5	314.2	47.7	7.423	986
67	R	1	45	646.95	NRM	AFD	5	160.23	-37.57	3.635	985
67	R	1	50	647	NRM	AFD	5	19	34.8	15.7	986
67	R	1	55	647.05	NRM	AFD	5	160.33	-51.85	2.033	985
67	R	1	60	647.1	NRM	AFD	5	18.2	49.4	8.484	986
67	R	1	65	647.15	NRM	AFD	5	4.5	-64.06	2.491	985
67	R	1	70	647.2	NRM	AFD	5	176.4	61.9	10.25	986
67	R	1	75	647.25	NRM	AFD	5	75.86	-12.41	1.411	985
67	R	1	80	647.3	NRM	AFD	5	104.6	61.5	12.59	986
67	R	1	85	647.35	NRM	AFD	5	327.57	-13.78	1.699	985
67	R	1	90	647.4	NRM	AFD	5	211.8	56.6	13.69	986
67	R	1	95	647.45	NRM	AFD	5	39.13	63.91	1.904	985
67	R	1	100	647.5	NRM	AFD	5	139.9	37.8	4.609	986
67	R	1	104	647.54	NRM	AFD	5	153.97	30.49	3.046	985
67	R	1	110	647.6	NRM	AFD	5	25.2	16.8	12.24	986
67	R	1	115	647.65	NRM	AFD	5	320.85	-32.48	1.581	985
67	R	1	120	647.7	NRM	AFD	5	219.2	65.2	14.63	986
67	R	1	125	647.75	NRM	AFD	5	121.38	-24.16	1.496	985
67	R	1	130	647.8	NRM	AFD	5	57.5	64	13.66	986
67	R	1	135	647.85	NRM	AFD	5	310.65	58.63	1.2	985
67	R	1	140	647.9	NRM	AFD	5	231.1	62.2	6.246	986
67	R	2	10	648.1	NRM	AFD	5	68.7	87.9	5.003	988
67	R	2	10	648.1	NRM	AFD	5	66.1	87.7	4.985	987
67	R	2	20	648.2	NRM	AFD	5	197.4	70.6	10.3	988
67	R	2	20	648.2	NRM	AFD	5	199	70.8	10.22	987
67	R	2	30	648.3	NRM	AFD	5	105.8	8.2	4.411	987
67	R	2	30	648.3	NRM	AFD	5	106.4	67.5	11.31	988
67	R	2	40	648.4	NRM	AFD	5	69.6	74.6	7.967	988
67	R	2	40	648.4	NRM	AFD	5	69.6	-43.5	3.068	987
67	R	2	50	648.5	NRM	AFD	5	21.1	-15.3	10.89	987
67	R	2	50	648.5	NRM	AFD	5	21.4	33.4	12.57	988
67	R	2	60	648.6	NRM	AFD	5	342	39.2	5.767	988
67	R	2	60	648.6	NRM	AFD	5	343.2	-54.1	7.578	987
67	R	2	70	648.7	NRM	AFD	5	274.9	-28.8	4.434	988
67	R	2	70	648.7	NRM	AFD	5	274.2	-28.6	4.427	987
67	R	2	80	648.8	NRM	AFD	5	262.6	-55.1	1.822	988
67	R	2	80	648.8	NRM	AFD	5	264.2	-55	1.784	987
67	R	2	90	648.9	NRM	AFD	5	170.2	-21.1	0.7667	988
67	R	2	90	648.9	NRM	AFD	5	170.8	-21	0.7381	987
67	R	2	100	649	NRM	AFD	5	285.6	-38.9	4.952	987
67	R	2	100	649	NRM	AFD	5	286.1	-39	5.022	988
67	R	2	110	649.1	NRM	AFD	5	75.7	10.1	6.921	987
67	R	2	110	649.1	NRM	AFD	5	76	10.8	7.057	988
67	R	2	120	649.2	NRM	AFD	5	80.9	69.8	4.58	987
67	R	2	120	649.2	NRM	AFD	5	89.9	31.8	26.81	988
67	R	2	130	649.3	NRM	AFD	5	229	-43.3	7.565	987
67	R	2	130	649.3	NRM	AFD	5	228.9	39.2	7.083	988
67	R	2	140	649.4	NRM	AFD	5	17.3	-40.4	1.863	988
67	R	3	10	649.6	NRM	AFD	5	200.6	-46	1.775	990
67	R	3	15	649.65	NRM	AFD	5	287.45	72.74	0.623	989
67	R	3	20	649.7	NRM	AFD	5	251.5	-70.3	2.579	990
67	R	3	25	649.75	NRM	AFD	5	13.94	-29.61	0.786	989
67	R	3	30	649.8	NRM	AFD	5	167.7	26.7	3.328	990
67	R	3	35	649.85	NRM	AFD	5	127.38	-9.65	2.573	989
67	R	3	40	649.9	NRM	AFD	5	52.8	62.8	23.82	990
67	R	3	45	649.95	NRM	AFD	5	240.08	23.72	3.271	989
67	R	3	50	650	NRM	AFD	5	299.4	47.7	19.72	990
67	R	3	55	650.05	NRM	AFD	5	136.44	19.18	0.658	989
67	R	3	60	650.1	NRM	AFD	5	40.8	-17.3	2.923	990
67	R	3	65	650.15	NRM	AFD	5	329.24	30.13	1.016	989
67	R	3	70	650.2	NRM	AFD	5	210.6	-28	4.41	990
67	R	3	75	650.25	NRM	AFD	5	11.09	40.33	0.597	989
67	R	3	80	650.3	NRM	AFD	5	172.6	-37.6	2.628	990
67	R	3	85	650.35	NRM	AFD	5	287.24	-19.5	0.173	989
67	R	3	90	650.4	NRM	AFD	5	258.5	15.9	0.7552	990
67	R	3	95	650.45	NRM	AFD	5	81.04	-28.02	2.093	989
67	R	3	100	650.5	NRM	AFD	5	99.2	26.7	8.753	990
67	R	3	104	650.54	NRM	AFD	5	83.97	-36.22	1.536	989
67	R	3	110	650.6	NRM	AFD	5	96.3	34.1	6.554	990
67	R	3	115	650.65	NRM	AFD	5	79.36	-50.62	2.124	989
67	R	3	120	650.7	NRM	AFD	5	100.4	48.7	8.774	990
67	R	3	125	650.75	NRM	AFD	5	63.67	-59.5	1.086	989
67	R	3	130	650.8	NRM	AFD	5	127	79.8	13.71	990
67	R	3	135	650.85	NRM	AFD	5	136.65	-19.15	2.625	989
67	R	3	140	650.9	NRM	AFD	5	42.6	51.3	17.02	990
67	R	4	15	651.15	NRM	AFD	5	52.16	2.4	0.333	991
67	R	4	25	651.25	NRM	AFD	5	346.73	65.46	0.333	991
68	R	1	10	656.3	NRM	AFD	5	299.8	20.7	3.679	993
68	R	1	15	656.35	NRM	AFD	5	187.94	-34.28	0.389	992
68	R	1	20	656.4	NRM	AFD	5	353.5	34.4	1.619	993
68	R	1	25	656.45	NRM	AFD	5	180.92	-37.02	0.494	992
68	R	1	30	656.5	NRM	AFD	5	0.6	35.2	2.069	993
68	R	1	35	656.55	NRM	AFD	5	238.17	-40.3	1.641	992
68	R	1	40	656.6	NRM	AFD	5	301.9	38	6.913	993
68	R	1	45	656.65	NRM	AFD	5	121.08	-44.05	0.266	992
68	R	1	50	656.7	NRM	AFD	5	62.6	43.5	1.144	993
68	R	1	55	656.75	NRM	AFD	5	358.31	28.73	1.913	992
68	R	1	60	656.8	NRM	AFD	5	181.3	-26.2	8.303	993
68	R	1	65	656.85	NRM	AFD	5	161.45	-34.42	1.283	992
68	R	1	70	656.9	NRM	AFD	5	18.9	32.4	5.416	993
68	R	1	75	656.95	NRM	AFD	5	165.7	-40.66	6.041	992
68	R	1	80	657	NRM	AFD	5	84	50.6	7.924	993
68	R	1	85	657.05	NRM	AFD	5	132.17	-37.54	9.148	992
68	R	1	90	657.1	NRM	AFD	5	45.4	42.9	4.142	993
68	R	1	95	657.15	NRM	AFD	5	118.29	-53.36	4.485	992
68	R	1	100	657.2	NRM	AFD	5	218.8	-16.3	18.3	993
68	R	1	104	657.24	NRM	AFD	5	34.68	-57.49	1.209	992
68	R	1	110	657.3	NRM	AFD	5	262.8	-16	20.57	993
68	R	1	115	657.35	NRM	AFD	5	290.16	-32.32	0.123	992
68	R	1	120	657.4	NRM	AFD	5	249.6	-87.5	9.484	993
68	R	1	125	657.45	NRM	AFD	5	44.72	-37.33	0.397	992
68	R	1	130	657.5	NRM	AFD	5	135.8	-80.7	8.864	993
68	R	1	135	657.55	NRM	AFD	5	5.23	-39.88	0.199	992
68	R	1	140	657.6	NRM	AFD	5	172	-85.6	9.236	993
68	R	2	15	657.85	NRM	AFD	5	146.93	-37.25	0.748	994
68	R	2	25	657.95	NRM	AFD	5	276.44	-12.94	0.359	994
68	R	2	35	658.05	NRM	AFD	5	122.48	-30.87	3.699	994
68	R	2	45	658.15	NRM	AFD	5	173.72	-49.92	2.092	994
68	R	2	55	658.25	NRM	AFD	5	255.55	-0.88	0.535	994
68	R	2	65	658.35	NRM	AFD	5	174.02	-33.12	4.631	994
68	R	2	75	658.45	NRM	AFD	5	155.66	-55.24	1.969	994
68	R	2	85	658.55	NRM	AFD	5	10.36	-9.98	0.186	994
68	R	2	95	658.65	NRM	AFD	5	169.45	-39.52	1.079	994
68	R	2	104	658.74	NRM	AFD	5	163.46	-39.6	2.907	994
68	R	2	115	658.85	NRM	AFD	5	148.01	-48.85	2.23	994
68	R	2	125	658.95	NRM	AFD	5	123.08	-40.5	3.529	994
68	R	2	135	659.05	NRM	AFD	5	131.21	-35.66	4.532	994
68	R	3	15	659.35	NRM	AFD	5	63.66	-56.53	3.836	995
68	R	3	25	659.45	NRM	AFD	5	19.65	-39.14	3.897	995
68	R	3	35	659.55	NRM	AFD	5	187.3	-67.78	2.801	995
68	R	3	45	659.65	NRM	AFD	5	203.04	-38.07	6.449	995
68	R	3	55	659.75	NRM	AFD	5	232.36	-63.72	2.109	995
68	R	3	65	659.85	NRM	AFD	5	224.26	-45.31	2.242	995
68	R	3	75	659.95	NRM	AFD	5	237.45	-40.48	1.371	995
68	R	3	85	660.05	NRM	AFD	5	100.73	-47.32	1.637	995
68	R	3	95	660.15	NRM	AFD	5	95.24	-47.01	2.848	995
68	R	3	104	660.24	NRM	AFD	5	98.9	-44.31	3.426	995
68	R	3	115	660.35	NRM	AFD	5	239.3	-69.21	3.048	995
68	R	3	125	660.45	NRM	AFD	5	266.11	-40.57	1.831	995
68	R	3	135	660.55	NRM	AFD	5	56.76	-6.91	0.094	995
68	R	4	15	660.85	NRM	AFD	5	319.61	-42.13	1.8	996
68	R	4	25	660.95	NRM	AFD	5	292.05	-41.74	3.871	996
68	R	4	35	661.05	NRM	AFD	5	74.61	-53.64	3.568	996
68	R	4	45	661.15	NRM	AFD	5	179.57	-47.64	2.249	996
68	R	4	55	661.25	NRM	AFD	5	192.09	-12.19	1.757	996
68	R	4	65	661.35	NRM	AFD	5	274.91	59.54	0.983	996
68	R	4	75	661.45	NRM	AFD	5	69.83	57.46	1.21	996
68	R	4	85	661.55	NRM	AFD	5	78.38	48.49	1.564	996
68	R	4	95	661.65	NRM	AFD	5	245.3	85.43	1.28	996
68	R	4	104	661.74	NRM	AFD	5	90.36	76.39	1.517	996
68	R	4	115	661.85	NRM	AFD	5	40.3	75.72	3.306	996
68	R	4	125	661.95	NRM	AFD	5	83.44	13.25	2.421	996
70	R	1	15	685.35	NRM	AFD	5	5.31	-51.26	3.469	997
70	R	1	25	685.45	NRM	AFD	5	228.03	-4.25	0.377	997
70	R	1	35	685.55	NRM	AFD	5	336.32	-8.75	0.275	997
70	R	1	45	685.65	NRM	AFD	5	221.93	65.07	0.658	997
70	R	1	55	685.75	NRM	AFD	5	308.88	60.89	0.691	997
70	R	1	65	685.85	NRM	AFD	5	207.23	84.32	0.842	997
70	R	1	75	685.95	NRM	AFD	5	190.4	83.34	0.727	997
70	R	1	85	686.05	NRM	AFD	5	36.56	63.65	0.547	997
70	R	1	95	686.15	NRM	AFD	5	35.33	48.02	0.44	997
70	R	1	104	686.24	NRM	AFD	5	24.57	44.66	0.36	997
70	R	1	115	686.35	NRM	AFD	5	0.58	58.84	0.481	997
70	R	1	125	686.45	NRM	AFD	5	1.96	45.34	0.738	997
70	R	1	135	686.55	NRM	AFD	5	78.12	75	0.421	997
70	R	2	15	686.85	NRM	AFD	5	313.9	59.25	0.317	998
70	R	2	25	686.95	NRM	AFD	5	346.83	56.52	0.371	998
70	R	2	35	687.05	NRM	AFD	5	356.76	54.61	0.52	998
70	R	2	45	687.15	NRM	AFD	5	328.7	56.61	0.641	998
70	R	2	55	687.25	NRM	AFD	5	337.63	51.3	0.734	998
70	R	2	65	687.35	NRM	AFD	5	150.99	68.89	0.459	998
70	R	2	75	687.45	NRM	AFD	5	174.44	46.26	0.383	998
70	R	2	85	687.55	NRM	AFD	5	181.26	58.23	0.33	998
70	R	2	95	687.65	NRM	AFD	5	117.16	66.82	0.458	998
70	R	2	104	687.74	NRM	AFD	5	81.29	50.11	0.559	998
70	R	2	115	687.85	NRM	AFD	5	88.87	57.92	0.535	998
70	R	2	125	687.95	NRM	AFD	5	72.04	65.47	0.768	998
70	R	2	135	688.05	NRM	AFD	5	73.81	68.17	0.809	998
70	R	3	15	688.35	NRM	AFD	5	85.99	61.54	0.576	999
70	R	3	25	688.45	NRM	AFD	5	111.65	75.81	0.378	999
70	R	3	35	688.55	NRM	AFD	5	42.72	44	0.502	999
70	R	3	45	688.65	NRM	AFD	5	228.04	64.67	0.363	999
70	R	3	55	688.75	NRM	AFD	5	234.41	40.81	0.469	999
70	R	3	65	688.85	NRM	AFD	5	196.67	66.3	0.367	999
70	R	3	75	688.95	NRM	AFD	5	95.64	33.81	0.353	999
70	R	3	85	689.05	NRM	AFD	5	283.5	82.72	0.178	999
70	R	3	95	689.15	NRM	AFD	5	317.97	72.84	0.367	999
70	R	3	104	689.24	NRM	AFD	5	97.65	55.79	0.592	999
71	R	1	10	694.9	NRM	AFD	5	276	58.8	12.33	1000
71	R	1	20	695	NRM	AFD	5	190.5	14.8	10.08	1000
71	R	1	30	695.1	NRM	AFD	5	116.1	-27.1	5.212	1000
71	R	1	40	695.2	NRM	AFD	5	292.3	-51.3	18.87	1000
71	R	1	50	695.3	NRM	AFD	5	317.8	-49.1	34.33	1000
71	R	1	60	695.4	NRM	AFD	5	308.2	-52.8	28.37	1000
71	R	1	70	695.5	NRM	AFD	5	316	-49.5	17.82	1000
71	R	1	80	695.6	NRM	AFD	5	283.5	-74.4	5.751	1000
71	R	1	90	695.7	NRM	AFD	5	286.9	-55.8	7.032	1000
71	R	1	100	695.8	NRM	AFD	5	274.6	-28.3	13.81	1000
71	R	1	110	695.9	NRM	AFD	5	282.4	-35.6	17.17	1000
71	R	1	120	696	NRM	AFD	5	274	-39.8	20.86	1000
71	R	1	130	696.1	NRM	AFD	5	282.6	-46.2	9.281	1000
